# Supplementary material for: Study protocol for developing, piloting and disseminating the PRISMA-COSMIN guideline: a new reporting guideline for systematic reviews of outcome measurement instruments
Source: PubMed Central journal article supplement (PMC9195229; doi:10.1186/s13643-022-01994-5), 2022-06-13
Supplement: 13643_2022_1994_MOESM1_ESM.pdf [file 13643_2022_1994_MOESM1_ESM.pdf]

**Additional file 1.** Group membership for the PRISMA-COSMIN guideline

| <b>Name</b>            | <b>PRISMA-COSMIN role</b> | <b>Primary affiliation</b>                                                                                                                                       |
|------------------------|---------------------------|------------------------------------------------------------------------------------------------------------------------------------------------------------------|
| Ellen Elsmann          | Steering committee        | Department of Epidemiology and Data Science, Amsterdam UMC, Vrije Universiteit Amsterdam, Amsterdam Public Health Research Institute, Amsterdam, the Netherlands |
| Martin Offringa        | Steering committee        | Child Health Evaluative Sciences, The Hospital for Sick Children Research Institute, Toronto, Ontario, Canada                                                    |
| Nancy Butcher          | Steering committee        | Child Health Evaluative Sciences, The Hospital for Sick Children Research Institute, Toronto, Ontario, Canada                                                    |
| David Moher            | Steering committee        | Centre for Journalology, Clinical Epidemiology Program, Ottawa Hospital Research Institute, Ottawa, Canada                                                       |
| Andrea Tricco          | Steering committee        | Li Ka Shing Knowledge Institute, St. Michael's Hospital, Unity Health Toronto, Toronto, Ontario, Canada                                                          |
| Wieneke Mokkink        | Steering committee        | Department of Epidemiology and Data Science, Amsterdam UMC, Vrije Universiteit Amsterdam, Amsterdam Public Health Research Institute, Amsterdam, the Netherlands |
| Caroline Terwee        | Steering committee        | Department of Epidemiology and Data Science, Amsterdam UMC, Vrije Universiteit Amsterdam, Amsterdam Public Health Research Institute, Amsterdam, the Netherlands |
| Joel Gagnier           | Steering committee        | Department of Epidemiology and Biostatistics, Schulich School of Medicine and Dentistry, London, Ontario, Canada                                                 |
| Maureen Smith          | Steering committee        | Cochrane Consumer Network, London, UK                                                                                                                            |
| Dorcas Beaton          | Technical advisory group  | Institute for Work & Health and Institute for Health Policy Management and Evaluation, University of Toronto, Toronto, Ontario, Canada                           |
| Olalekan Lee Aiyegbusi | Technical advisory group  | Centre for Patient Reported Outcomes Research, Institute of Applied Health Research, University of Birmingham, Birmingham, United Kingdom                        |
| Cornelia Borkhoff      | Technical advisory group  | Institute of Health Policy, Management, and Evaluation, University of Toronto, Toronto, Ontario, Canada                                                          |
| Suneeta Monga          | Technical advisory group  | The Hospital for Sick Children, Toronto, Canada                                                                                                                  |
| Karen Wong             | Technical advisory group  | The Hospital for Sick Children, Toronto, Canada                                                                                                                  |
| Anne Klassen           | Technical advisory group  | McMaster University, Hamilton, ON, Canada                                                                                                                        |
| Carolina Barnett-Tapia | Technical advisory group  | Division of Neurology, Department of Medicine, University Health network and University of Toronto, Toronto, Ontario, Canada                                     |
| Karolin Krause         | Technical advisory group  | Evidence Based Practice Unit, Faculty of Brain Sciences, University College London, London, UK                                                                   |
| Elizabeth Potter       | Technical advisory group  | School of Epidemiology and Public Health, University of Ottawa, Ontario, Canada                                                                                  |
| Peter Tugwell          | Technical advisory group  | Department of Medicine and School of Epidemiology, Public Health and Preventive Medicine, University of Ottawa, Ottawa, Ontario, Canada                          |
